# Supplementary material for: On the importance to consider the cloud dependence in parameterizing the albedo of snow on sea ice
Source: Copernicus journal article supplement (doi:10.5194/tc-18-4053-2024), 2024-09-06
Supplement: Supplementary file 1 [file tc-18-4053-2024-supplement.pdf]

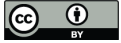

*Supplement of*

## **On the importance to consider the cloud dependence in parameterizing the albedo of snow on sea ice**

**Lara Foth et al.**

*Correspondence to:* Wolfgang Dorn ([wolfgang.dorn@awi.de](mailto:wolfgang.dorn@awi.de))

The copyright of individual parts of the supplement might differ from the article licence.

## S1 Supplementary figures

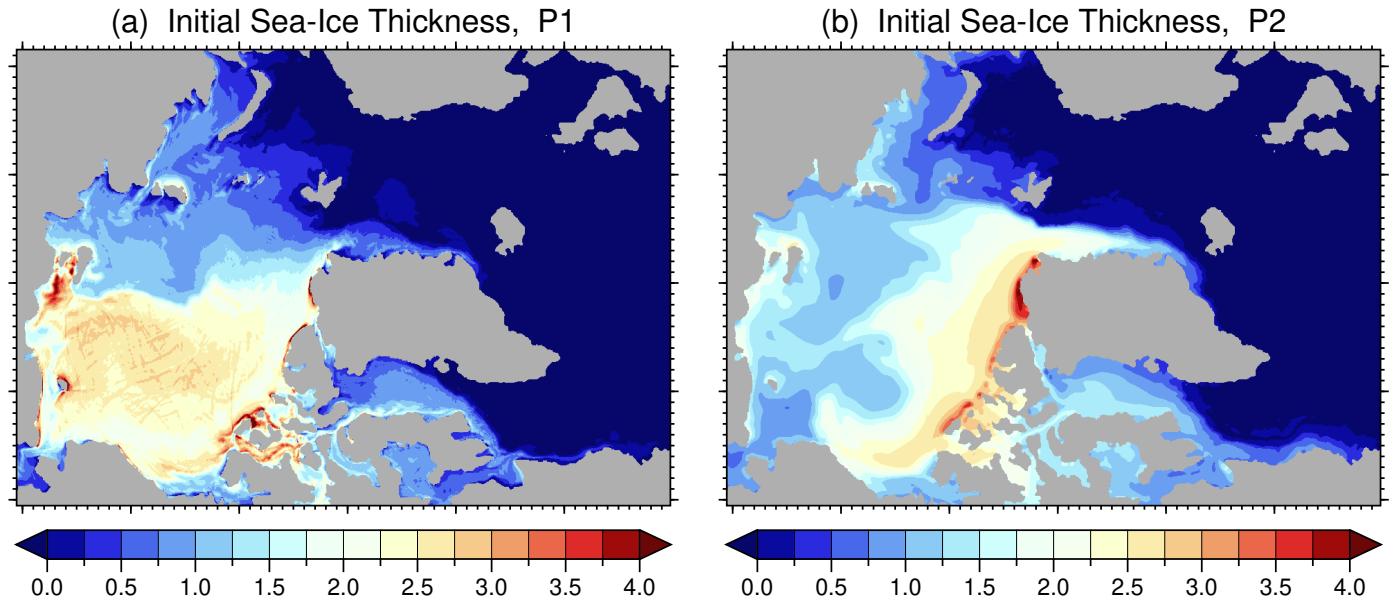

**Figure S1.** Initial sea-ice thickness fields (in meters) for the simulations of the pairs P1 (a) and P2 (b). Each pair consists of two simulations, one simulation with the original snow albedo parameterization (HNold), the other with the revised snow albedo parameterization (HNnew).

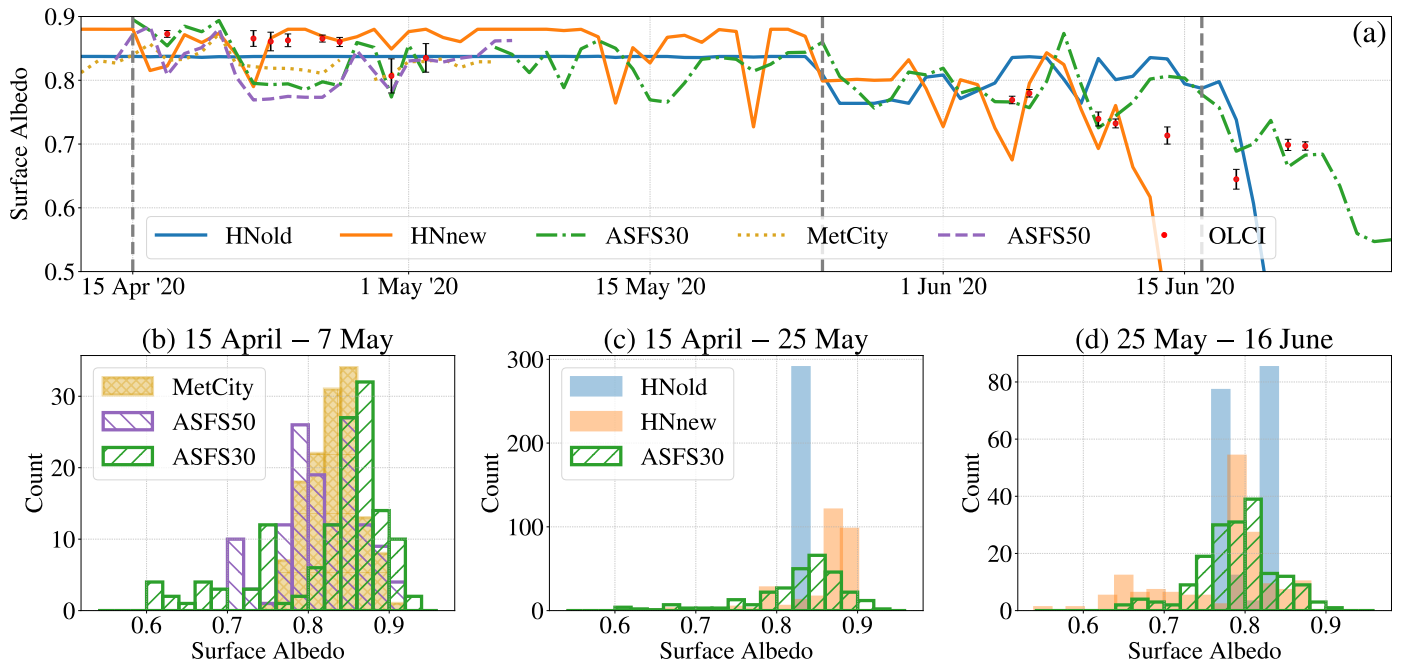

**Figure S2.** Top: **(a)** time series of daily mean sea-ice surface albedo from the two P2 simulations (HNold and HNnew), from three irradiance measurements (ASFS30, MetCity, ASFS50), and from the satellite observations (OLCI) for the period from mid-April 2020 to the end of June 2020. The dashed vertical lines indicate the beginning and the end, respectively, of the two evaluation periods: the cold period (15 April–25 May) and the snowmelt period (25 May–16 June), based on the P2 simulations. Bottom: frequency distributions of three-hourly mean sea-ice surface albedo from **(b)** the three irradiance measurements for the period when measurements from all three sites are available, **(c)** the two simulations and ASFS30 for the cold period, and **(d)** the two simulations and ASFS30 for the snowmelt period.

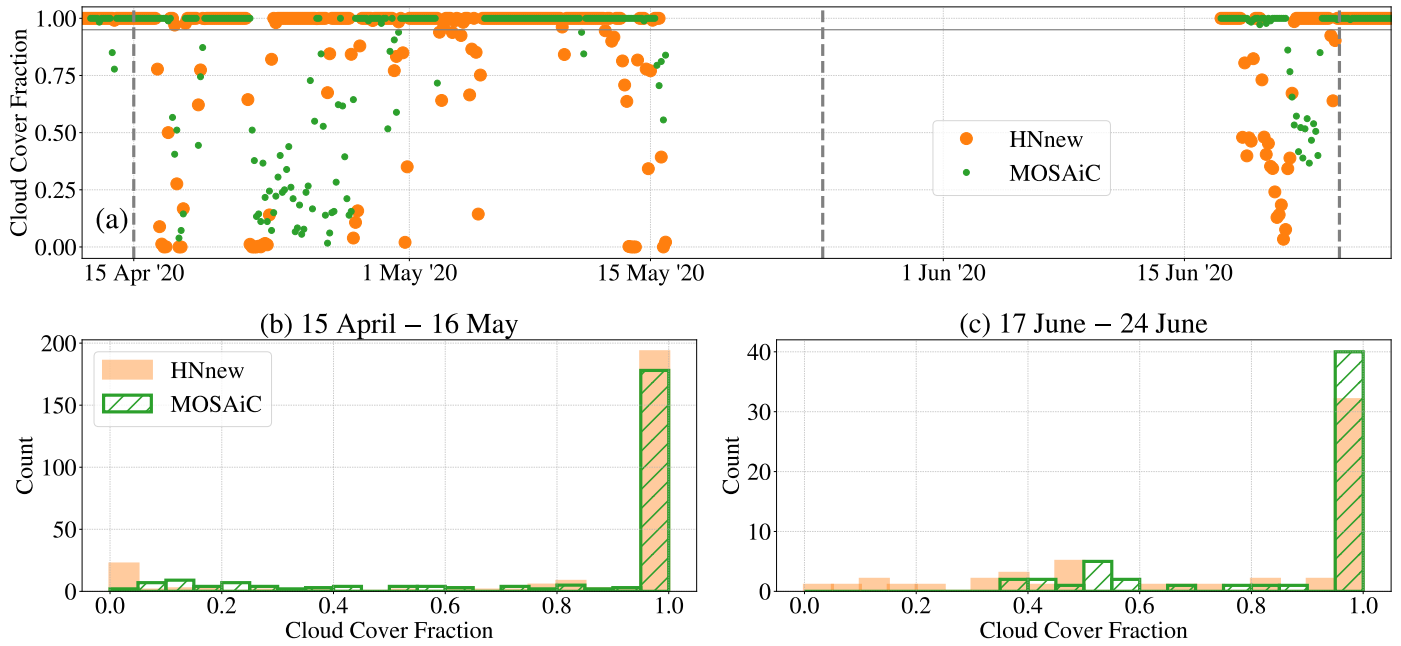

**Figure S3.** Top: (a) time series of three-hourly mean total cloud-cover fraction from the P2 simulation HNnew and the MOSAiC measurements for the period from mid-April 2020 to the end of June 2020. The dashed vertical lines indicate the beginning and the end of the two evaluation periods: the cold period (15 April–25 May) and the snowmelt period (25 May–24 June), based on the P1 simulations. Bottom: frequency distributions of three-hourly mean total cloud-cover fraction from the simulation HNnew and the MOSAiC measurements for (b) the cold period and (c) the snowmelt period. MOSAiC measurements are not available between 16 May and 17 June due to the transition of the research vessel *Polarstern*.
